# Supplementary material for: Dicarbonyl-modified lipoproteins contribute to proteinuric kidney injury
Source: PubMed Central journal article supplement (PMC9675465; doi:10.1172/jci.insight.161878), 2022-11-08
Supplement: jciinsight-7-161878-s228.pdf [file jciinsight-7-161878-s228.pdf]

**Supplemental Table 1: Demographic and clinical characteristics of patients and controls**

|                                              | Controls (n=19) | Patients (n=50)   |
|----------------------------------------------|-----------------|-------------------|
| Sex                                          |                 |                   |
| Female                                       | 53% (10)        | 38% (19)          |
| Male                                         | 47% (9)         | 62% (31)          |
| Age (yrs)                                    | 15.32±0.89 (19) | 11.56±0.74 (50)   |
| Race*                                        |                 |                   |
| White                                        | 37% (7)         | 62% (31)          |
| Black                                        | 0% (0)          | 14% (7)           |
| Asian                                        | 16% (3)         | 4% (2)            |
| Primary diagnosis                            |                 |                   |
| Glomerulonephritis                           |                 | 18% (9)           |
| Nephrotic syndrome                           |                 | 30% (15)          |
| Transplant                                   |                 | 22% (11)          |
| Dysplasia/CAKUT                              |                 | 22% (11)          |
| Others                                       |                 | 8% (4)            |
| GFR Schwartz (ml/min/1.73m <sup>2</sup> ) ** | 83.60±4.84 (5)  | 62.71±4.83 (38)   |
| Urine albumin/creatinine (ACR) (mg/g)        | 11.57±2.50 (13) | 217.00±48.42 (45) |
| Urine apoA1/creatinine (µg/mg)               | 0.21±0.15 (16)  | 2.89±1.12 (45)    |

x±s:mean±SE, n in parentheses

\*Race extracted from charts

\*\*GFR documented within 6 months of the study visit

**Supplemental Table 2: Summary of results in patients and animal models**

| Model           | Species | Nephron segment affected | ACR   | Urinary apoA1 | Urinary IsoLG |
|-----------------|---------|--------------------------|-------|---------------|---------------|
| Varying disease | Human   | Varied                   | ↑ ↑ ↑ | ↑ ↑ ↑         | ↑             |
| NEP25           | Mouse   | Glomerulus               | ↑ ↑ ↑ | ↑ ↑ ↑         | ↑             |
| PAN             | Rat     | Glomerulus               | ↑ ↑ ↑ | ↑ ↑ ↑         | ↑             |
| DT              | Mouse   | Proximal tubule          | ↑ ↑   | ↑             | →             |
| FA              | Mouse   | Distal tubule            | ↑     | →             | NA            |

↑ = increased, → = no change, NA = not available

NEP25: Nphs1-hCD25 transgenic mice; PAN: Puromycin aminonucleoside; DT: Diphtheria toxin; FA: Folic acid; ACR: Urinary albumin:creatinine ratio; apoA1: Urinary apolipoprotein A1; IsoLG: Isolevuglandin
